# Supplementary material
Source: PubMed Central journal article supplement (PMC6597818)
Supplement: supp_RA118.007120_142526_2_supp_328668_pr92vm.pdf [file supp_RA118.007120_142526_2_supp_328668_pr92vm.pdf]

## Supporting Information

The thermophilic biomass-degrading bacterium *Caldicellulosiruptor bescii* utilizes two enzymes to oxidize glyceraldehyde-3-phosphate during glycolysis

**Israel M. Scott<sup>1§</sup>, Gabriel M. Rubinstein<sup>1§</sup>, Farris L. Poole II<sup>1</sup>, Gina L. Lipscomb<sup>1</sup>, Gerrit J. Schut<sup>1</sup>, Amanda M. Williams-Rhaesa<sup>2</sup>, David M. Stevenson<sup>3</sup>, Daniel Amador-Noguez<sup>3</sup>, Robert M. Kelly<sup>4</sup> and Michael W. W. Adams<sup>1\*</sup>**

<sup>1</sup>Dept. of Biochemistry and Molecular Biology, University of Georgia,  
Athens, GA 30602, USA

<sup>2</sup>New Materials Institute, University of Georgia, Athens, GA 30602, USA

<sup>3</sup>Dept. of Bacteriology, University of Wisconsin-Madison, Madison, WI 53706, USA

<sup>4</sup>Dept. of Chemical and Biomolecular Engineering, North Carolina State University, Raleigh, NC 27695,  
USA

<sup>§</sup>These authors contributed equally to this work

\*To whom correspondence should be addressed:

Michael W. W. Adams (adamsm@uga.edu)

**Supplementary Tables S1-S5 and Figures S1-S10**

**Table S1. Protein concentration dependent activity of GOR**

| Enzyme Assay | [GAP] (mM) | GOR (mg) | Total Activity (U) | Specific Activity (U/mg) |
|--------------|------------|----------|--------------------|--------------------------|
| GOR          | 1          | 0        | 0                  | 0.0                      |
| GOR          | 1          | 0.005    | 0.31               | 61.3                     |
| GOR          | 1          | 0.010    | 0.62               | 61.7                     |
| GOR          | 1          | 0.015    | 0.92               | 61.6                     |

Standard assays were conducted with 1 mM BV in 2 mL of 50 mM EPPS buffer, pH 8.0, in sealed anaerobic cuvettes. Reactions were carried out with varying concentrations of purified His-tagged GOR and reactions were initiated by the addition of GAP. Increasing concentrations of enzyme increased the total BV reduction activity, but specific activity remained constant. Without the addition of GOR, no GAP dependent reduction of BV was observed, demonstrating that GOR is responsible for the measured activity.

**Table S2. Effect of TPI on standard GAPDH and GOR activities**

| Enzyme Assay | TPI | [GAP] (mM) | [DHAP] (mM) | Predicted Activity | Specific Activity (U/mg) |
|--------------|-----|------------|-------------|--------------------|--------------------------|
| GOR          | -   | 0          | 10          | No                 | 0.0                      |
| GOR          | -   | 1          | 0           | Yes                | 61.3                     |
| GOR          | -   | 1          | 1           | Yes                | 47.6                     |
| GOR          | -   | 1          | 10          | Yes                | 18.1                     |
| GOR          | +   | 0          | 10          | Yes                | 16.7                     |
| GOR          | +   | 1          | 0           | No                 | 1.5                      |
| GOR          | +   | 5          | 0           | Yes                | 190.1                    |
| GOR          | +   | 15         | 0           | Yes                | 645.5                    |
| GAPDH        | -   | 1          | 0           | Yes                | 0.9                      |
| GAPDH        | -   | 0          | 10          | No                 | 0.1                      |
| GAPDH        | -   | 1          | 10          | Yes                | 4.4                      |
| GAPDH        | +   | 0          | 10          | Yes                | 2.6                      |
| GAPDH        | +   | 1          | 0           | No                 | 0.0                      |
| GAPDH        | +   | 5          | 0           | Yes                | 2.2                      |
| GAPDH        | +   | 15         | 0           | Yes                | 23                       |

Standard GOR and GAPDH assays were performed in sealed anaerobic cuvettes in 2 mL of EPPS buffer, pH 8.0. GOR assay included 1 mM BV and 0.005 mg of purified His-tagged GOR. GAPDH assays included 20 mM dipotassium phosphate, 1 mM NAD and 20  $\mu$ L of partially purified GAPDH (1.6 mg/mL). Reactions marked “+” contained 30  $\mu$ L of partially purified TPI (10 mg/mL) while those designated “-“ did not include TPI (although minor TPI contamination of GAPDH is indicated by background activity when DHAP but no GAP was added). Reactions containing GAP were initiated by the addition of GAP to the assay mixture. Reactions containing containing TPI but no GAP were initiated by the addition of TPI. Specific activity is expressed per mg of GOR or GAPDH.

**Table S3. Strains used and constructed in this study**

| Strain   | Parent   | Genotype                                  | Alias         | Reference  |
|----------|----------|-------------------------------------------|---------------|------------|
| MACB1032 |          | $\Delta pyrE \Delta cbeI$                 |               | (1)        |
| JWCB018  |          | $\Delta pyrFA \Delta cbeI$                |               | (2)        |
| MACB1010 | JWCB018  | $\Delta pyrFA \Delta cbeI:P_{slp}xor-pfd$ | OE-XOR/PFD    | This study |
| MACB1050 | MACB1032 | $\Delta pyrE \Delta cbeI \Delta gorL$     | $\Delta gorL$ | This study |
| MACB1074 | MACB1032 | $\Delta pyrE \Delta cbeI \Delta gorS$     | $\Delta gorS$ | This study |

**Table S4. MS-based metabolomics of  $\Delta$ gorL and parent strains**

| <b>Metabolite</b>           | <b>Log<sub>2</sub> Fold change<sup>a</sup></b> |
|-----------------------------|------------------------------------------------|
| Homocysteine                | 3.555 ± 0.363                                  |
| Ribose 5-phosphate          | 1.675 ± 0.234                                  |
| Sedheptulose 7-phosphate    | 1.614 ± 0.179                                  |
| 4-hydroxybenzoate           | 1.478 ± 0.276                                  |
| Glucose-6-phosphate         | 1.341 ± 0.097                                  |
| Fructose 6-phosphate        | 1.318 ± 0.082                                  |
| Malate                      | 0.916 ± 0.026                                  |
| Ribulose 5-phosphate        | 0.892 ± 0.267                                  |
| Glycerol-3-phosphate        | 0.525 ± 0.016                                  |
| Fructose 1_6-bisphosphate   | 0.505 ± 0.06                                   |
| Dihydroxy acetone phosphate | 0.485 ± 0.013                                  |
| Threonine                   | 0.477 ± 0.069                                  |
| Valine                      | 0.278 ± 0.04                                   |
| Phenylalanine               | 0.253 ± 0.015                                  |
| Myoinositol                 | 0.238 ± 0.005                                  |
| Glutamate                   | 0.164 ± 0.006                                  |
| Serine                      | 0.164 ± 0.044                                  |
| Leucine                     | 0.044 ± 0.001                                  |
| Succinate                   | 0.002 ± 0                                      |
| Pyruvate                    | -0.019 ± 0.001                                 |
| UDP-N-acetylglucosamine     | -0.127 ± 0.005                                 |
| Phenylpyruvate              | -0.177 ± 0.005                                 |
| Methionine                  | -0.354 ± 0.029                                 |
| Aspartic acid               | -0.445 ± 0.022                                 |
| 2-ketoglutarate             | -0.454 ± 0.031                                 |
| Tyrosine                    | -0.772 ± 0.030                                 |
| Dihydroorotate              | -0.820 ± 0.046                                 |
| Isoleucine                  | -1.071 ± 0.012                                 |
| Fumarate                    | -1.326 ± 0.135                                 |
| NAD+                        | -1.407 ± 0.145                                 |
| Citrate                     | -1.769 ± 0.022                                 |
| Quinolate                   | -2.060 ± 0.824                                 |
| 3-phosphoglycerate          | -4.122 ± 0.142                                 |
| Phosphoenolpyruvate         | -4.525 ± 0.178                                 |

<sup>a</sup>Changes in concentration are given relative to the parent strain.

**Table S5. Primers used in this study**

| Primer              | Target locus          | Sequence (5'-3')                                                    |
|---------------------|-----------------------|---------------------------------------------------------------------|
| ISAORKO3'F          | 3' flank <i>gor-L</i> | AAGTTAGGCTGGTGGGTACCTTCCCAAATCTGCACCCTAT<br>C                       |
| JAB0004             | 3' flank <i>gor-L</i> | CAAAAAAACTATTTACCTCTACTCCAATCTTCATTTAAAA<br>TGGAATTCTTTT<br>TGAAAC  |
| JAB0003             | pAR003                | TTAAAATGGAATTCTTTTTGAAACATCAAC                                      |
| JAB002              | pAR003                | CTGCATAGCCTCTTTTAAATCCTGTCTTACTCACTCACCTC<br>TTCCATTG               |
| JAB001              | 5' flank <i>gor-L</i> | CTTACTCACTCACCTCTTCCATTG                                            |
| ISAORKO5'R          | 5' flank <i>gor-L</i> | GGACTATGAAGGAGAGCTGAATTCTCTGACGCTCAGT                               |
| ISAORKOvectorF      | pGL104(1)             | TGAATTCTCTGACGCTCAG                                                 |
| ISCB003             | pGL104                | CTTTCTACATAGAAAGGATGGTCTCTAGAATGAATAAAG<br>ATGCTTACAT<br>TCAAATGTTC |
| GLCB096             | pGL104                | ATGAATAAAGATGCTTACATTCAAATGTTC                                      |
| ISAORKOvectorR      | pGL104                | GTTAGGCTGGTGGGTACC                                                  |
| ISCB004             | pims006               | CATAGCCTCTTTTAAATCCTGT                                              |
| JAB0003             | pims006               | TTAAAATGGAATTCTTTTTGAAACATCAAC                                      |
| ISCB005             | 5' flank <i>gor-S</i> | CATAGCCTCTTTTAAATCCTGTTTAAATCACCACCTGTAA<br>AATC                    |
| ISCB006             | 5' flank <i>got-S</i> | GGAAAGCTTATTAATTATGTAAAATAAGAATTCTCTGACG<br>CTCAG                   |
| ISCB007             | pims006               | GAATTCTCTGACGCTCAG                                                  |
| ISCB008             | pims006               | GTTAGGCTGGTGGGTACC                                                  |
| ISCB009             | 3' flank <i>gor-S</i> | CTTATAAAGTCTTTGCCTATCATTTAAAATGGAATTCTTTT<br>TGAAAC                 |
| ISCB010             | 3' flank <i>gor-S</i> | GTTAGGCTGGTGGGTACCCTGTTGTCTTTATCCCCAAAAG                            |
| IS<br>AORKOvectorR2 | pIMSPFAOR             | CCAATGATCGAAGTTAGGCTGGTGGTACCTTATTTTACAT<br>AATTAATAAG              |
| IS<br>AORKOvectorF2 | pIMSPFAOR             | GCAGATAGAAGGAATTCTCTGACGCTCAGTGGAAC                                 |
| IS tagAOR5'F2       | 5' flank <i>gor-S</i> | CGAAGTTAGGCTGGTGGTACCTTATTTTACATAATTAATA<br>AGCTTTCC                |
| IS tagAOR5'R        | 5' flank <i>gor-S</i> | GGTTCTTCGAGCTGATAACACAGGATTTA                                       |

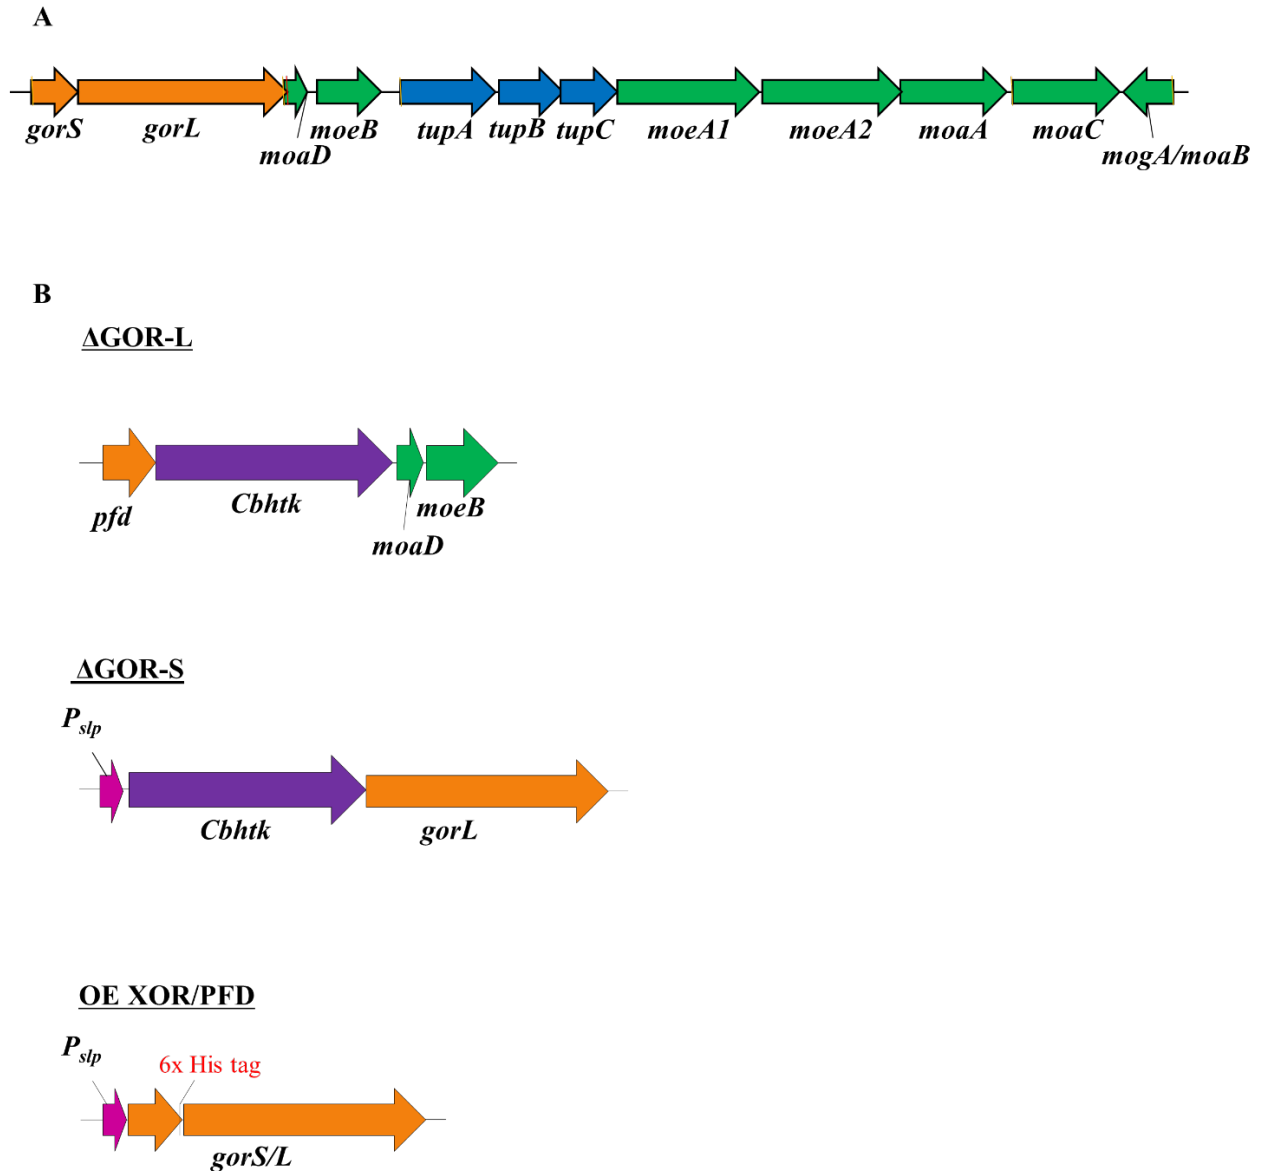

**Figure S1.** A) *C. bescii* gene cluster (Athe\_0820 to Athe\_0831) encoding GOR-L and GOR-S (orange) and the proteins necessary for pyranopterin biosynthesis (green) and tungstate transport (blue). B) Gene organization of recombinant strains of *C. bescii*  $\Delta$ *gorL* (MACB1050),  $\Delta$ *gorS* (MACB1074) and OE-XOR/PFD (MACB1010). Abbreviations: *slp*, S-layer protein; *Cbhtk*, thermostable kanamycin resistance gene.

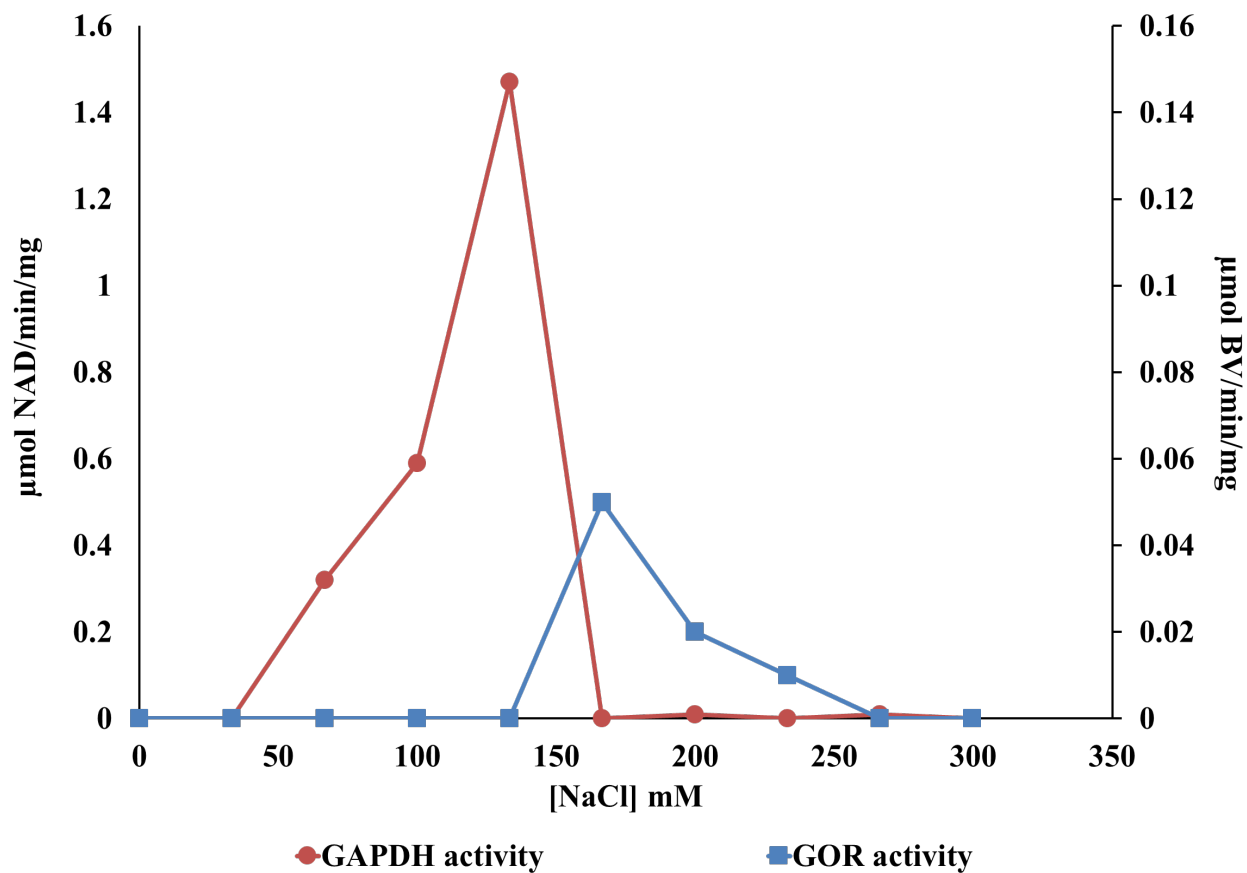

**Figure S2. Activity of GOR and GAPDH following separation by anion exchange chromatography.** The activity of GAPDH (red) and GOR (blue) were determined by the GAP-dependent reduction of NAD and benzyl viologen (BV), respectively. The concentrations were GAP (5 mM), NAD (1 mM) and BV (1 mM).



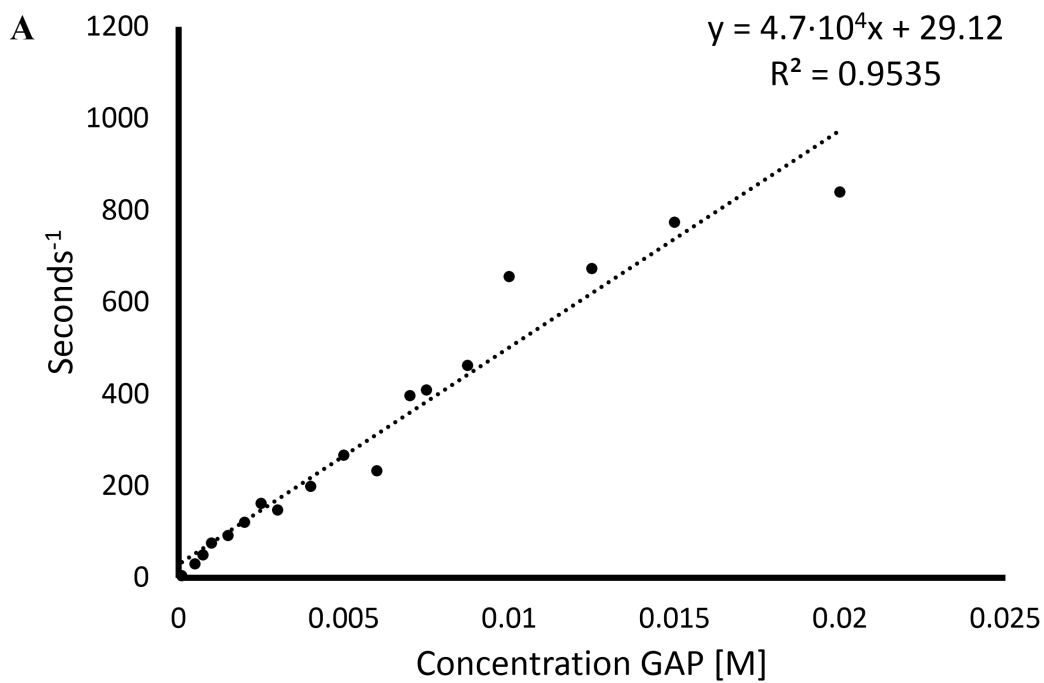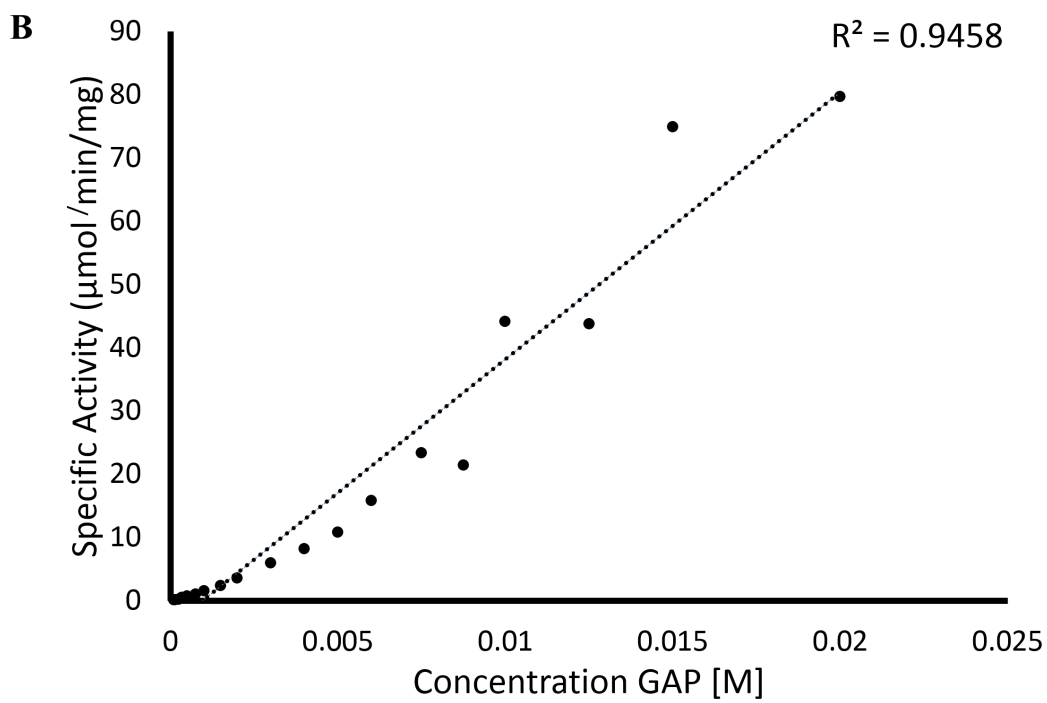

**Figure S3.** Kinetic properties of purified GOR (A) and partially purified GAPDH (B). The activities were measured by reduction of BV and NAD, respectively, both at a concentration 1 mM.

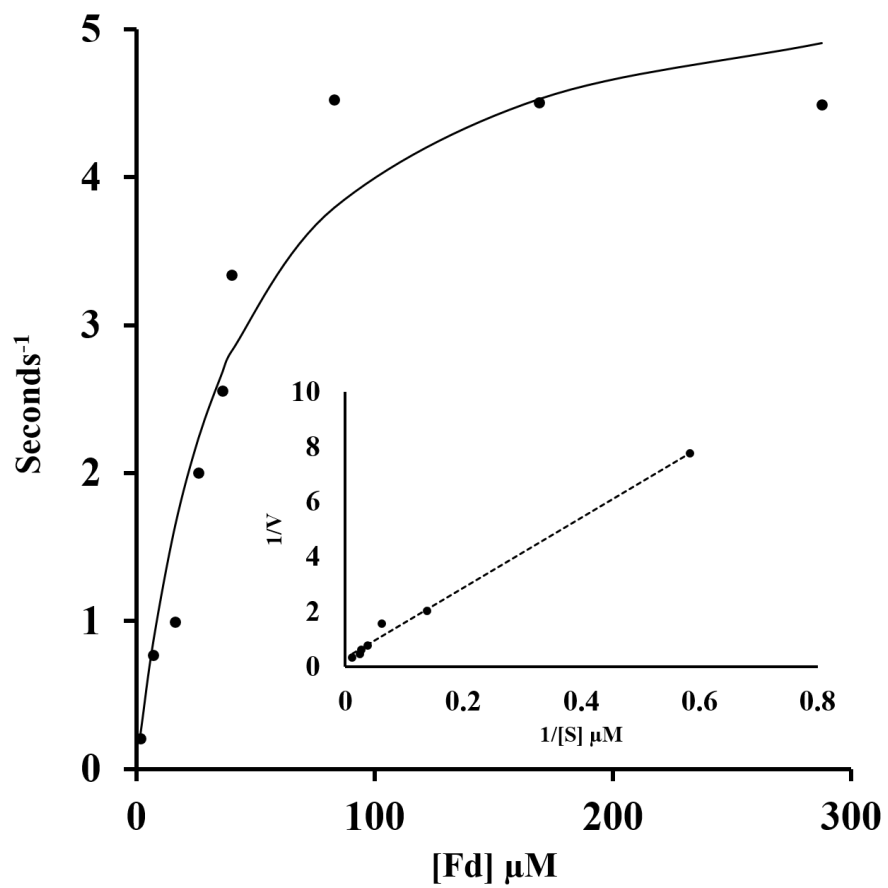

**Figure S4.** Kinetic properties of purified GOR using *C. bescii* ferredoxin as the electron acceptor. The concentration of GAP was 5 mM.

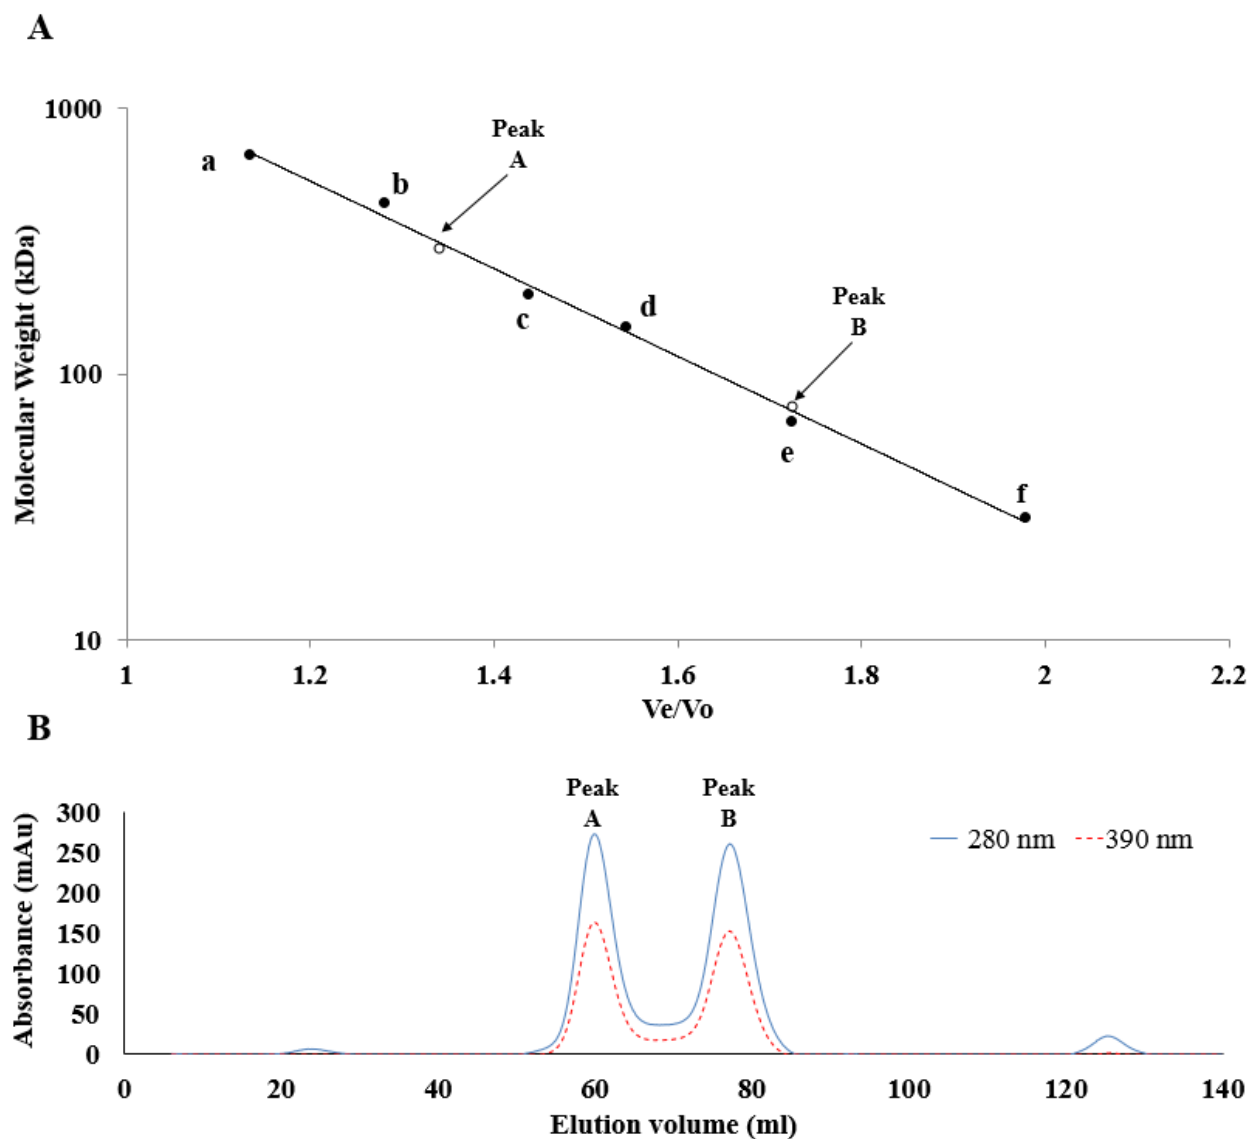

**Figure S5.** A) Estimated molecular mass of GOR holoenzyme (Peak B) and GOR heterodimer (Peak A; open circles/arrows). The standard proteins (closed circles) are (a) thyroglobulin (669 kDa), (b) apoferritin (443 kDa), (c) amylase (200 kDa), (d) alcohol dehydrogenase (150 kDa), (e) albumin (66 kDa) and (f) carbonic anhydrase (29 kDa). B) Size exclusion chromatography elution profile of affinity purified GOR showing GOR holoenzyme (Peak B) and GOR heterodimer (Peak A). Fractions were monitored in the UV (280 nm for protein) and visible (390 nm for iron-sulfur clusters) regions.

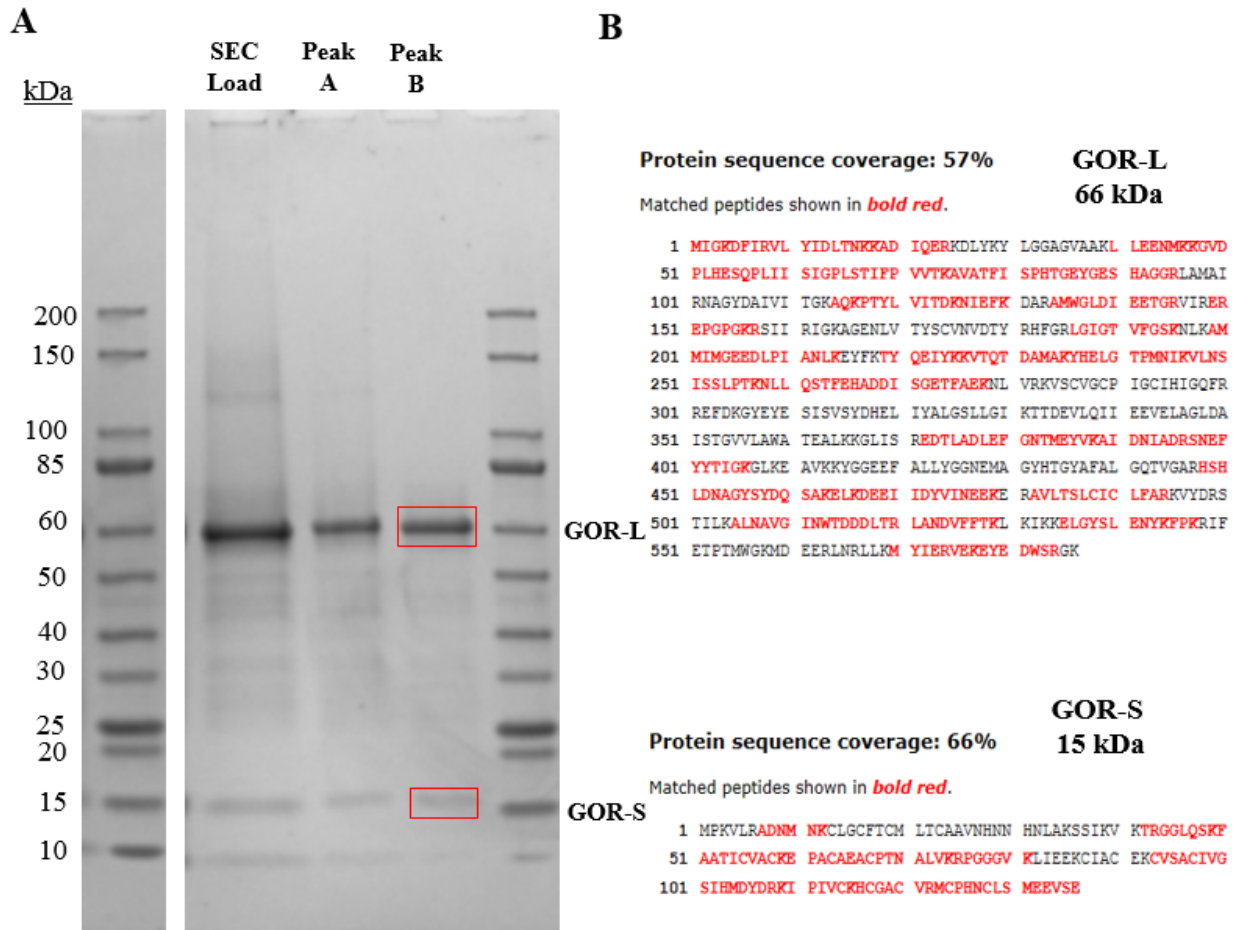

**Figure S6.** A). SDS-PAGE analysis of GOR following ion exchange, affinity and size exclusion chromatography steps from cell extract of the *C. bescii* strain OE-XOR/PFD. Lane 1 affinity purified GOR lanes 2 and 3, peaks A and B respectively from size exclusion chromatography (refer to Figure S5B). Gel was stained with Imperial Protein Stain B). MS/MS analysis of the indicated bands. Peptides that matched the sequence of GOR-L and GOR-S are shown in red. Red boxes indicate bands excised for MS analysis.

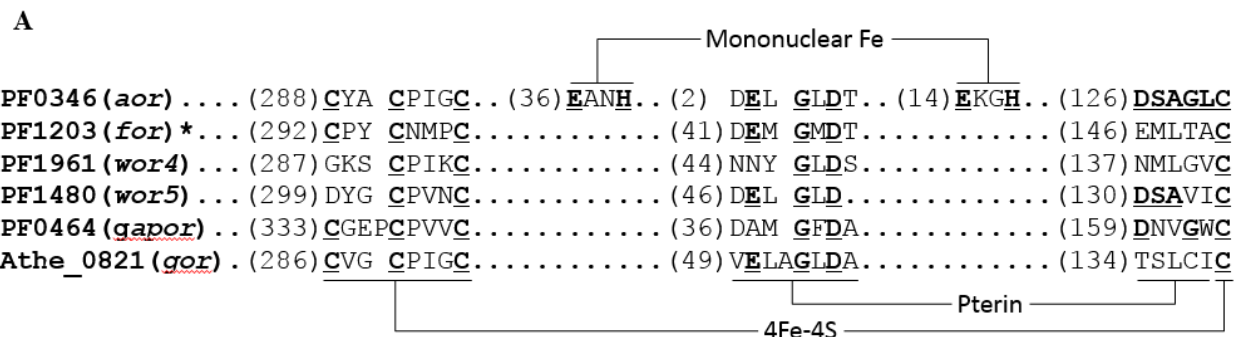

**B**

MPKVLRADNMNKCLGCFTCMLTCAAVNHNHNLAKSSIKVKTRGGLQSKFAATICVACKEPACAEACP  
 TNALVKRPGGGVKLIEEKCIACEKCVSACIVGSIHMDYDRKIPIVCKHCGACVRMCPHNCLSMEEVSE

**Figure S7.** A). Pterin and [4Fe-4S]-binding motifs in the WOR family enzymes. B). Sequence of GOR-S showing the four cysteine motifs.

\*The NCBI RefSeq protein start position shown here for FOR (PF1203) differs from that of the previously purified protein, which contains an additional eight residues at the N-terminus (3).

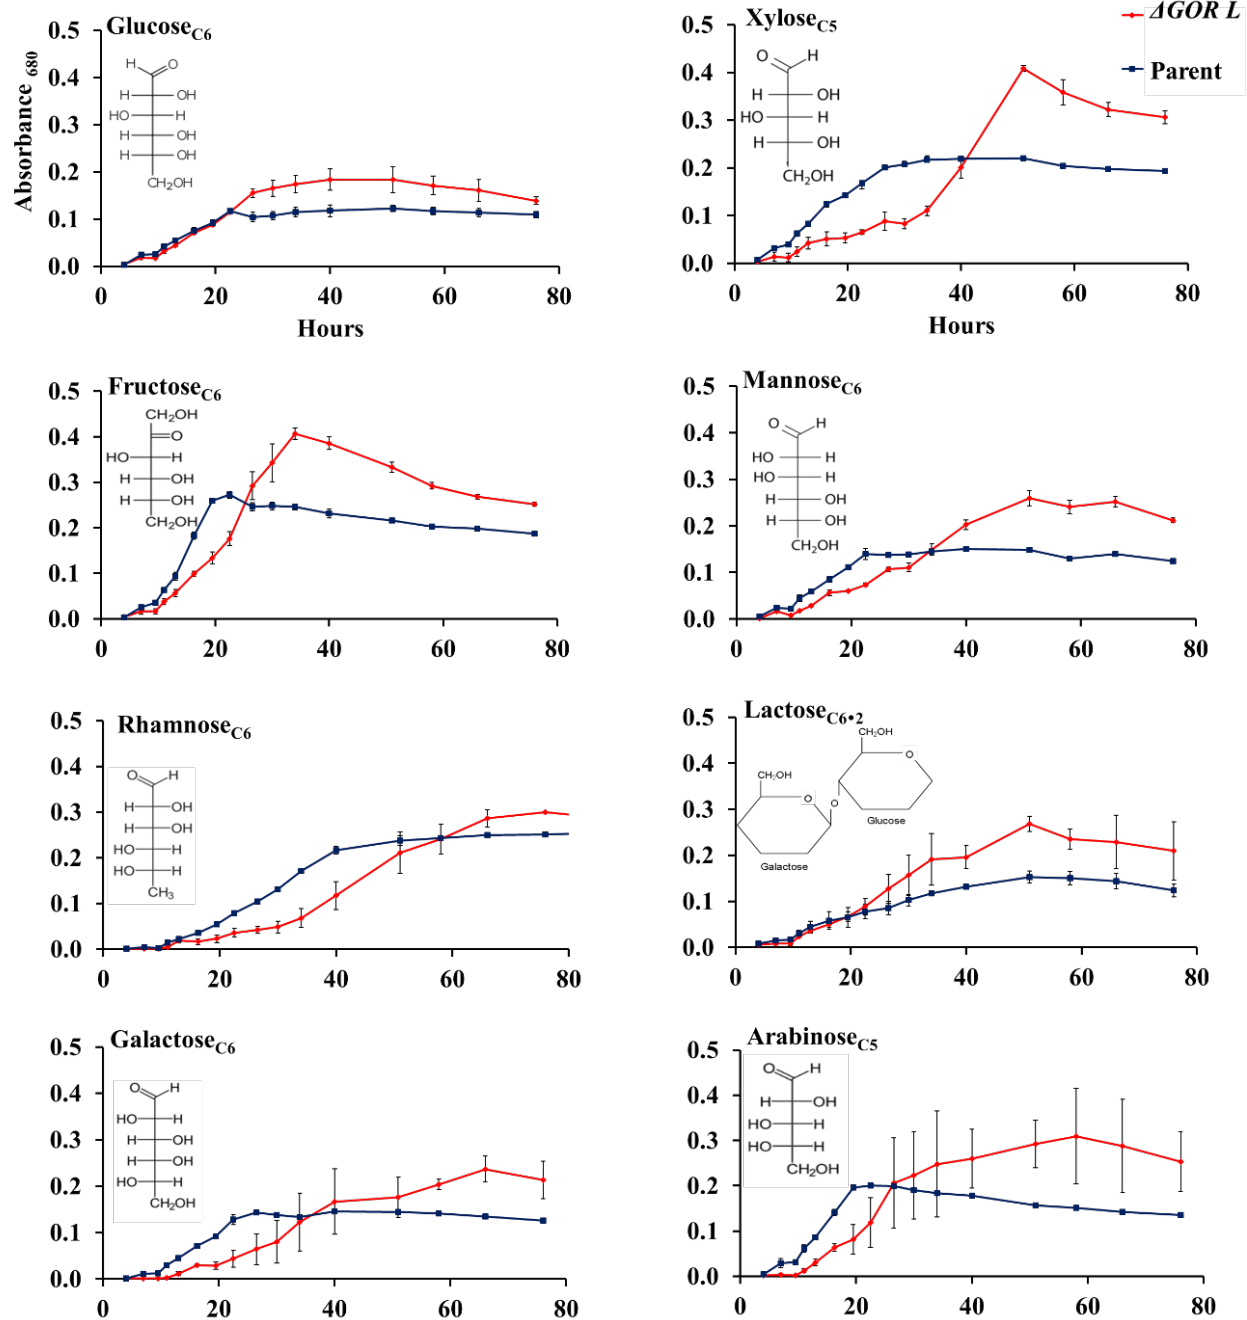

**Figure S8.** Growth of the parent (blue) and  $\Delta gorL$  (red) strains on the indicated carbon sources at 75°C (n=3).

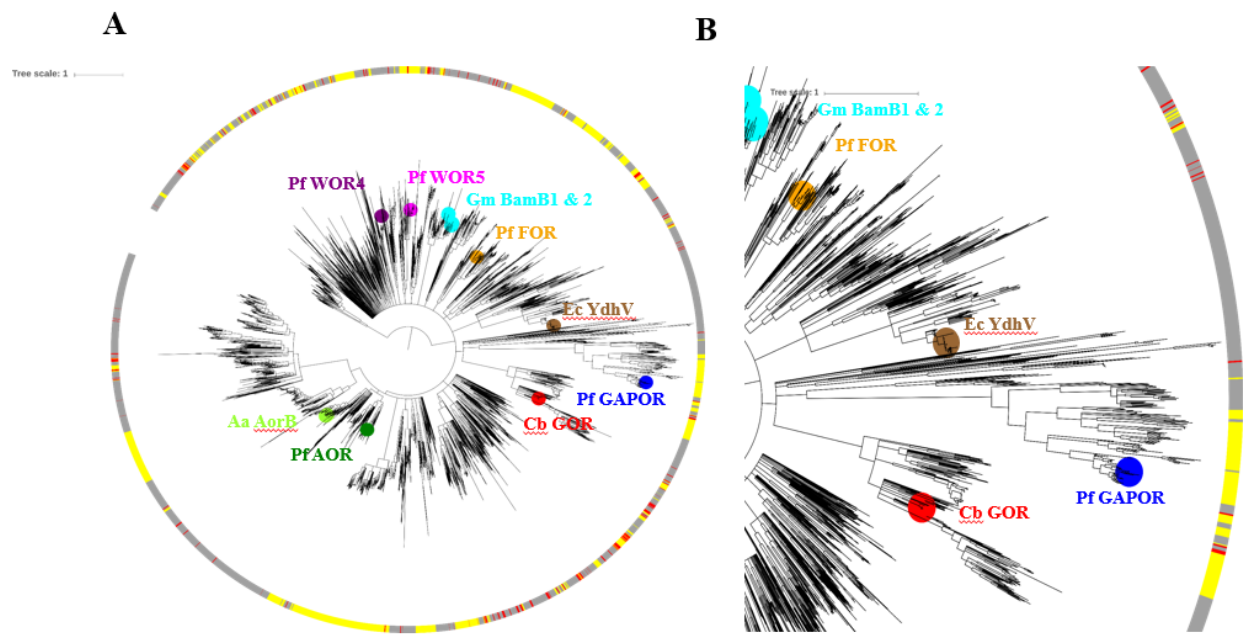

**Figure S9.** A). Phylogenetic tree of the WOR family of enzymes 4,063 *C. bescii* GOR-L sequence homologs based on InterPro domains (IPR013983 and IPR001203). Only branches with ultrafast bootstrap (UFBoot) values greater or equal to 94% confidence are displayed. represent GOR-L (red) and five previously identified *P. furiosus* tungsten-containing oxidoreductase enzymes, AOR (dark green), WOR4 (purple), WOR5 (pink), FOR (gold), GAPOR (blue), and three others, Aa AorB (lime green), Ec YdhV (brown) and Gm BamB 1 & 2 (cyan). The outer ring indicates the source of the sequences where bacteria are gray, archaea are yellow and unknown environmental sequences are red. B). An enlarged region of a phylogenetic tree featuring *C. bescii* GOR (Cb GOR) and *P. furiosus* GAPOR (Pf GAPOR).

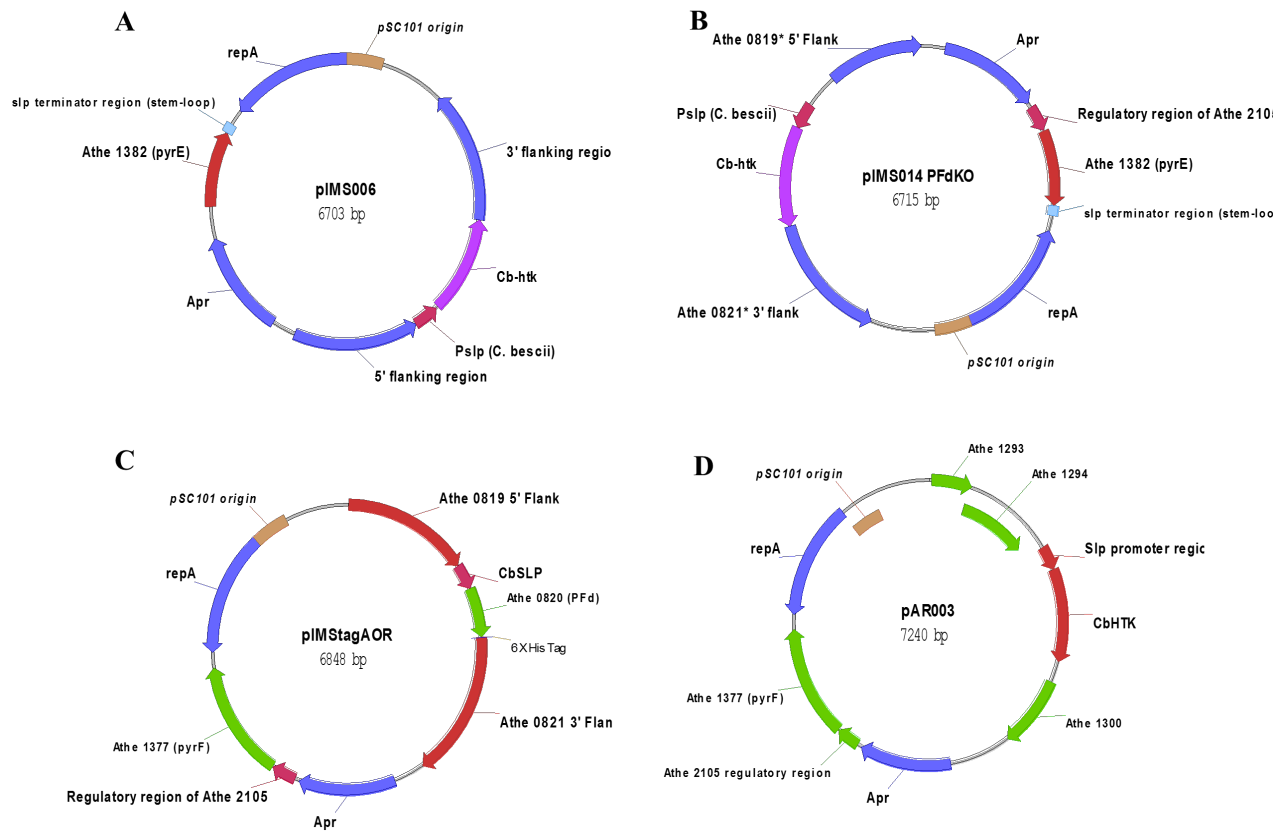

**Figure S10.** Plasmids used in this study for A) deletion of *gorL* (pIMS006), B) deletion of *gorS* (Pfd; pIMS014) and C) overexpression of His-tagged GOR (pIMStagAOR). CbHTK under control of the *slp* promoter was cloned from D) (pAP003).



## Supplemental References

1. Lipscomb, G. L., Conway, J. M., Blumer-Schuetz, S. E., Kelly, R. M., and Adams, M. W. (2016) A highly thermostable kanamycin resistance marker expands the toolkit for genetic manipulation of *Caldicellulosiruptor bescii*. *Appl Environ Microbiol* **82**, 4421-4428
2. Chung, D., Cha, M., Guss, A. M., and Westpheling, J. (2014) Direct conversion of plant biomass to ethanol by engineered *Caldicellulosiruptor bescii*. *Proc Nat Acad Sci* **111**, 8931-8936
3. Roy, R., Mukund, S., Schut, G. J., Dunn, D. M., Weiss, R., and Adams, M. W. (1999) Purification and molecular characterization of the tungsten-containing formaldehyde ferredoxin oxidoreductase from the hyperthermophilic archaeon *Pyrococcus furiosus*: the third of a putative five-member tungstoenzyme family. *J Bacteriol* **181**, 1171-1180
